# Supplementary material for: The genomes of many yam species contain transcriptionally active endogenous geminiviral sequences that may be functionally expressed
Source: PubMed Central journal article supplement (PMC5014472; doi:10.1093/ve/vev002), 2015-05-26
Supplement: Supplementary_Data.pdf [file Supplementary_Data.pdf]

**Supplementary Figure 1.** (A) Annotated 2.6 Kb endogenous geminivirus nucleotidic sequence of *D. alata*. (B). Annotated 2.1 Kb endogenous geminivirus nucleotidic sequence of *D. alata*.

**Supplementary Figure 2.** Alignment of the putative Rep sequences of EGV1 and EGV2 with the Rep of six representative geminiviruses (Tomato golden mosaic virus (TGMV), Maize streak virus (MSV), Eragrostis curvula streak virus (ECSV), Bean golden mosaic virus (BGMV), Beet curly top virus (BCTV) and Tomato pseudo-curly top virus (TPCTV)). RCR motifs (I, II, III and GRS) and SF3 helicase motifs (Walker A, B and C), which are conserved in geminiviruses, are highlighted in red.

**Supplementary Figure 3.** Rolling circle amplification. Lanes: 1) Ladder; 2) pUC19; 3) African cassava mosaic virus (ACMV); 4) *Dioscorea badnavirus*; 5) Water; 6) *Dioscorea alata* (acc. #313, seedlings); 7) *Dioscorea transversa* (acc. #336).

**Supplementary Figure 4.** Maximum likelihood tree of eighteen 402 bp partial rep sequences obtained using the “ren-ren” and “rep-rep” primer pairs.

**Supplementary Figure 5.** (A) Western blot on the total protein extracts of several *Dioscorea* species, using an antibody directed to a Rep peptide of EGV1 and (B) nitrocellulose membrane stained with Ponceau S dye for protein detection during western blotting. Lanes: 1) Proteins extracted from a turnip plant infected by Cauliflower mosaic virus (CaMV); 2) a Tomato plant infected by Tomato yellow leaf curl virus (TYLCV); 3) Ladder; 4) *Dioscorea trifida* (accession#64); 5) *Dioscorea sansibarensis* (accession#269); 6) *Dioscorea bulbifera* (accession#272); 7) *Dioscorea dumetorum* (accession#47); 8) *Dioscorea togoensis* (accession#114, seedling); 9) *Dioscorea praeheasilis* (accession#255); 10) *Dioscorea rotundata* (accession#118, seedling); 11) *Dioscorea nummularia* (accession#335); 12) *Dioscorea alata* (accession#297, seedling); 13) *Dioscorea alata* (accession#313 seedling); 14) *Dioscorea alata* (accession#402 seedling). No cross-reactivity was detected in the turnip/CaMV, tomato/TYLCV, *D. trifida* and *D. sansibarensis* samples.

**Supplementary Figure 6.** Maximum likelihood trees of replication enhancer protein (Ren) amino acid sequences (JTT substitution model) of EGV1 and representative geminiviruses, from the genera begomovirus, topocovirus and curtovirus. Numbers associated with branches indicate degrees of bootstrap support (100 replicates) for those branches.

**Supplementary Figure 7.** Duplication and diversification of the yam EGVs following their integration. Two scenarios resulting in contrasting patterns of endogenous sequence diversity are expected and presented. (A) The endogenous sequences were only duplicated (indicated by red arrows) either at or very close to the time when the integration event occurred (indicated by green arrow), or (B) The endogenous sequences are duplicated for prolonged periods post-integration such that duplication and speciation events (indicated by blue arrows) are interspersed. In (A) endogenous sequences sampled from one species will usually be more closely related to endogenous sequences from different species than they are to other genetically distinct endogenous sequences sampled from the

same species. In (B) genetically distinct endogenous sequences sampled from the same species should frequently be more closely related to one another than they are to endogenous sequences sampled from different species.

**A- EGV1 annotated sequence from *D. alata* acc. 313**

Virion strand origin of replication      Inverted repeat sequence

TAATATTACACGGATGGCCGCCCCGACTGTACTGCCACGTGGCGCATTTTGATAGGTCCACGCTAAAGATGCTGTACCC 80  
GATTGTCTCCACGGTAAAGATGCTGTACCCGATTGTCTCCACCGTACATCCACGCGCCATCATGGCATTGGTCCATT 160  
AAATACAAACCGCGCCCGAAATTTAATATGCCGAGAAAAATAAATAGCGCCCGAATTGATGTGTTCCTTTCTCTGGCG 240  
TGGGTCCCACTATATTCAAAAATAATAATAAACAAACCATTTAATAGTGTGTGGTACAAGAGTGGCCAAATTGTTGA 320  
AATATATTCAAACACTCTACAGCGCCGTATGATGACTACATCAATATCGAGAACTTGGACCGGAAGGCTAATTATTATA 400  
TAAGGCGATGAACCAGAGTCTCCTCTCAGGCAAGATGGATAAGGAAGAAATAATGGCCGTATACCTGCTCTTCTCAGAT 480  
ACGGACCATCAGAAATAATTAATGTTTGCACGGCATTTCGCATCGCCGAAGCAATTGAGGAAAATCCACTACCTCTTCTG 560  
GAATATGTCAACTCACTTCAGAAGCATCAAGAAGCCGTGTACAGAATGCTCCGCGAAGCCGGGAAAAC TAGTAGTGAAGT 640  
AGAAGAAGTCACTGAGGCTTATACCGTCGTTGACAGATCCGGCAAGAAGAAAAAATGAAAGTGAAGACCTCGGCGAAG 720  
TTGGTACCTCGAAGGGAGTTGTTTCTACCGGATGGTACTGTCATACATCCGGCGTCGTATATTTATATTAGTATTAGTA 800  
TTGTAATCAGTAGTCTGTACTGCTTATGTTAATTAATGTTTTCGAAAGAAATGAACTATTGTTCAGAAATATATAATCAA 880

Ren gene stop codon

ACGAAGATTAATACATAACA TTAATACAAGTTGAACTGAATATGGGCCGACTGTTGTACAGATAACATATATCTATCAA 960  
TCGGCCCACGAAATGTTTTACAGCGCTACTACAGCATTAAATAGAAATTACACCGAAATCATACAAATACTGTAAAATAC 1040  
GATTGCGAAATACATGTAGAAAACCACTAGATGATGGCCGTAGAGTTGTCATATGGTGAAAGTAAGCCAGCATTATGT 1120  
ATCTGTAGAGCACGTCGAAGATTGTAGTTGAACCGTATTTCAACGGTTATACGGT CCCAGTTTTCCCGCACGGTCTGTC 1200

Potential PolyA signal

CAAA TGATCCTTTATACGAAAATACAATGGGTTGGATAATTCCCAGTAAAATACACCCCGGTTTGCCTGTTCAACTGTGA 1280

Ren gene start codon      Ren gene stop codon

TGTCATCACCGGTTCTGTAAAT CATTTCAGATGCCGGAATTTGTTGAAGCTGAATTTGTACAAGGC TTA ACTTGAGAAC 1360  
TAGGACCTATGCTGTCTCGGTCGACTCAGGCGTTTGGTACAGAGGGCAATATATGAAATCAAATACCGCATTCTTCAA 1440  
GTCCATTACGTAAACCAAACCTGGTCGGGTCTATCAAGATAATCTTTGTAGCTGCAGTCATTACCAGGATTACACAGAAC 1520  
TATTGACGGTACTTCTCCCTTGATCCTGACAGGCTTGCCATATTTGCAATTAGTTAGCCAATGCCGTTGAGACCCGATCA 1600  
AATGTTTCCAATGCTTCATACGGAGATAATTTGGCTCGATGTCGTCATTACATTGTAATAACATCATTGTTGAATACC 1680  
TTCGGATTGAAGTCCAGATGACCACTTATGTAGTTATGGGGGCCAAAGAACGAGCCCATGCTGTTTTTCCAATCCGACT 1760  
GGGCCCTTCAAGAATCAAACCTCGTTGGCCGGTCCAAACCAACCTTTGGGACTATTATATTATCTCCATTAGGCCGCGCAG 1840  
CGTCATTGATCTGAAAATATGATTAATCCAATCATTATCACAGGAGTTATCACAAACGTAGAATAGTTCCAATTAGAT 1920  
ATATATTTTTCAGGAGCTTTGTAAATATCCTGTCATAGTTAGCCTGTAGATTATGATATGTAAATGTAAGCTCTGGG 2000  
ATCCCTCTCTCTAATTAATTGCAAAGCATCTTCAGCAGAACCAAAATTTAAAGCATCTGCATATACGGTTGATAGACTAC 2080  
GTCTTCCATCCCTTGTAGATCTACCATCAACCTGGAACCTCTCCCAGTCCATGTAATCCCTCCTTTCTCGATGTATTCC 2160

A-T Rich Region

TTAACGTCGGAGCTGGATTAGCTGACTGAATATTTGGATGG AATTTTATAGAA GATGAA GGTGAGTGAAGATCGAATAA 2240  
CCTGTTAATTTGTTACCTGTGCTCTGCCCTCCAACCTGTATTAATA CATGTAGATGTGGAGAACCATCCTCATGTAACTCTC 2320  
TAGCAACCCGATGTACTTCTTGTGCTTGCAGG GCACACTTCTAGCAATTGCTGTAATGCCTCCTCCTTTGTTCAGAGAA 2400

Ren gene start codon

CACCTGGCGTAGGTCAGGAAGTAATTTCTAGCATTTAATCTGAACTGCCTCGGTCTGACAGG CATATTTGCTAAATAATA 2480

Potential Itron sequences (type B) [5]

TA **BAACACT** AAGCTAATGGACCGGCAGTAATGTAAATGAGTCTTACACACTTCTGCAACAGGGAAATTTCAAAAACCCCT 2560  
 Potential complementary- and virion-sense gene TATA box  
 Inverted repeat sequence [2]  
 TAGCAATCGGTGTATGTGTGTATGT **TATATAGGCGACCC** CAGAAGGCTCAGAAGGCTCAGAAGGCCACA **AGCCATCC** 2640  
**GT** 2642

**A- EGV1 annotated sequence from *D. nummularia* acc. 313**

Virion strand origin of replication  
 Inverted repeat sequence  
**TAATATTACACGGATGGCC** GCCCCGTCCGTACTGCAACGTGTCGAGTTTGGATTGGTCTTCGAAAAAGAAGAAGTACTTG 80  
 CTGTCTCCCTTCGTACGTCCACGTGGCTTGTCTCATGAGCCATTCAAATTTAAACCGGCGCCGAATCCTTTTGCCT 160  
 CTTTCTCAGTTTGTGGGACCCACTAATTTCAAAAATAAATATTAATAAAGCAGAAAAATAATGGAGTGGGTGCGAGACAATA 240  
 TTGTTTGTACATAAAGTGGCCCATAGAGGGGAAATAAATTTCAAAAACCCCTACAGGGCCGTATGATGACCGGTTACAGTTAT 320  
 TGAGAACTTGGATTGGAAGAATTAATAATTATATAAAGTGCCGAACCGGAGTTACCTCTCAGGCAAGATGGAGAAGGAAG 400  
 AAATCATGGCCGTATACCTGCTCTTCCCTCAGATACGGTCTATCTGCAATAATTAAGAGTGTACATGGTATTTGTATTGCT 480  
 GAAGCCATCAAGGAAATCCCTTACCTCTCCTTGAGTATGTCAACTCACTGTAGAAGCACCAAGATGCTATGTACCGAAT 560  
 Ren aene stop codon  
 GCTCCGCGAAGCCAGCAAGTCCAGCAAGGATGTACAGGAGGTTA **CCGATGCATATACAGTGGTCGATAGAGCCAGTAATA** 640  
 AAAAAAATGAACTAGAGGACCTCGGTGAAGTTGGGACCTCTAAGGGTGTGGTGTCCACTGTTTGGTGAAGTACATGTA 720  
 Ren aene start codon  
 TTTGTATAAC **CAT** ATATGGAATGAAGTAATGTATCACGTATGTATATTTGTGCTTATTATCAGTTATTCCAAAAATAAA 800  
 GAATGTCAATTTGGGAAAAATTATATGTATGTTAAGACATAACCGGTGCCTTATATAAAAAATAAAACACATATTTGCATA 880  
 ATAAATAATTTTAAATACAGTTGAACATGACATGGGCCGACTGTTGTACATATAGAATAAACCCATCAAACCGGCCACG 960  
 Rep aene stop codon  
 AAATGAGTAACAACACATATTACAGTATTAATAAAAATTACACCAAATTTATTCAAATACTGCAAGATGCGA **TTA** CAAAA 1040  
 TACATGAAGGAATCCCGCAGATGAAGGCCGTAGATCGAGTTATCCACAGGGTGAAGATAGCCAGCATTGTGTATTTCGT 1120  
 AGTGCACGACGTAAATTTAGTTGAACCATATTTGACGGTTATACGGTCCAGTTGTTATTGAACGGTCTGTCTATATG 1200  
 ATCCTTTTATACGAAATAACAATGGCTTGACAATTTCCAGTAAATACGCCTCTGTTTGCCTGTACCACAGTAATGTCTT 1280  
 CACCTGTTCTGAAATCCATCCGAGATACGGTTATGGAATCAAACCTCGGCATTCCTTCAGAGTCCATTCACGCAAACCTAAG 1360  
 TTGTGGGTGCGATCAAGATAATCCTTGTAGCTTGAATCATTTCCAGGATTACACAGAACTATAGACGGGACTCCACCCTT 1440  
 GATCTTGACAGGCTTCCATACTTGCAATTCGTTTGCCAATCCCGTTGAGACCAATCAAATGTTTCCAGTGCTTGAGCC 1520  
 GTAGATAACTTGGTTCTACGTCAATGATGTTGTAGAAGATATCATTTGGAATGTCTTCGGATTGAAGTCCAGATGA 1600  
 CCACTGATGTAATTTATGGGGCCCAATGACCGAGCCATGCGGTTTCCCAACCGACTGGGCCCTTCAAGGATCAAGCT 1680  
 GGTGGCCCTGTCCAGCCCAACCTTAGGGATTATATATATCTCCATTAGGCCGTGCAGCGTCATTAATATGAAAATTAT 1760  
 Rep gene start codon  
 TGTTAATCCAAT **CAT** TCATCACAGGATTTACATGAGGATGGTTCTCCACATCTAGATG **GGGAGAAG** CATCCTCACATAAC 1840  
 TCCCTTGCAACCCGTATGTACTTCTTGTGCTTGAAGAGACACCTCCAGTAATTGCCGTAATGCCTCCTACTTGGTTAA 1920  
 Potential iteron sequences (type B) [5]  
**AGAAC** ACTTGGCATAAGTCAGGAAGTAATCTTATCATTCATCTGAACTGTTTAGGTCTGACAGGCATCTCTGCGAAAA 2000  
 AA **GGGAGAA** GAATGGCACTTCTGTAAATAATGGCTTACACACTTCTCCAACAGTATTTTGCAAAAACCCATATCTATGT 2080  
 Potential complementary- and virion-sense gene TATA box

GTGTAAGTGTGTATCTTATATAAGCGAACCCCAAAAAGCCCCAGAAAGCCATCCGT

Figure S1



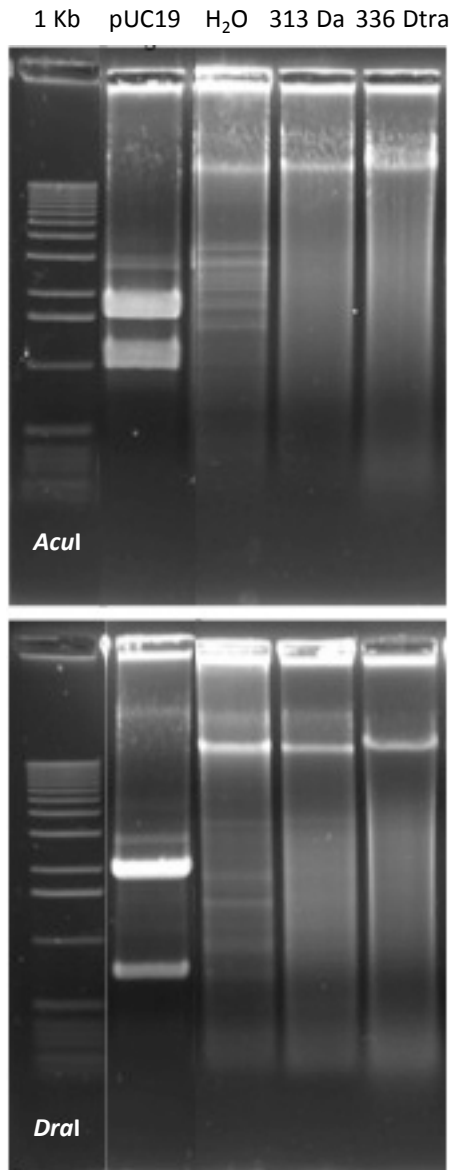

Figure S3

**Rolling circle amplification using a cocktail of random and specific primers used for detecting EGV1 or EGV2.**

1. Ladder
2. pUC19
3. H<sub>2</sub>O
4. *Dioscorea alata* (acc. #313, seedlings)
5. *Dioscorea transversa* (acc. #336)

**Maximum likelihood tree of eighteen 402 bp partial *rep* sequences obtained using the “*ren-ren*” and “*rep-rep*” primer pairs.**

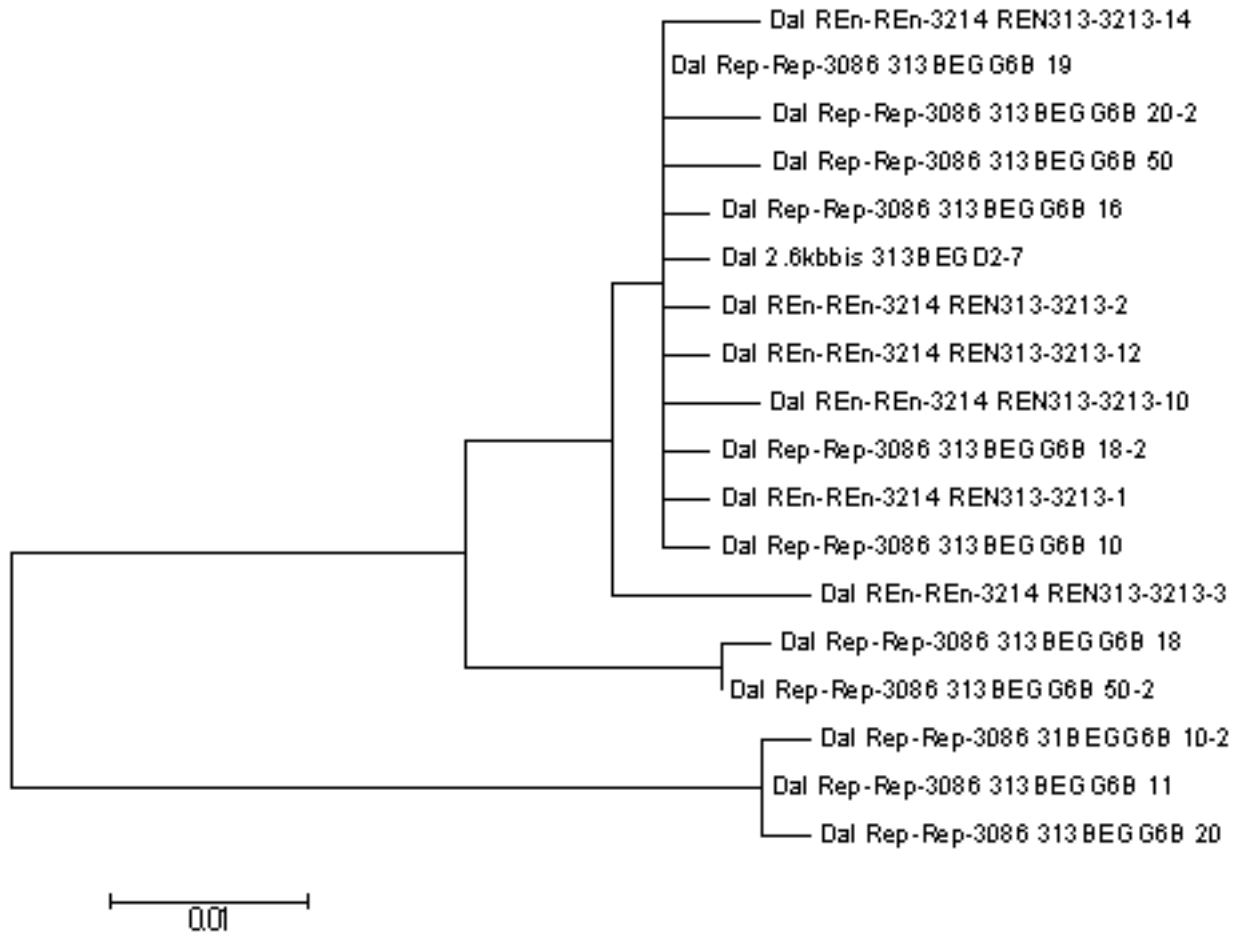

Figure S4



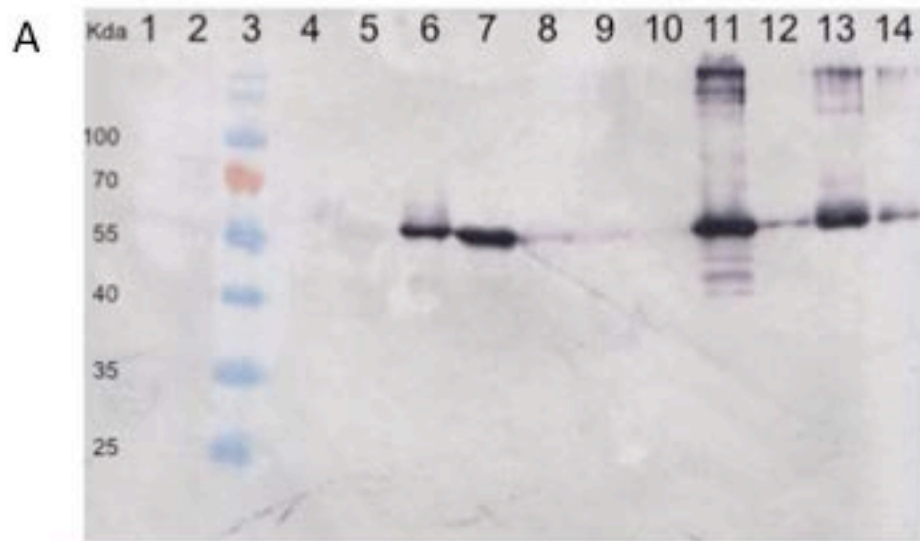

Figure S5

A: Western blot on the total protein extracts of several *Dioscorea* species, using an antibody directed to a Rep peptide of EGV1

B: The nitrocellulose membrane stained with Ponceau S dye for protein detection during western blotting.

Lanes:

- 1) Proteins extracted from a turnip plant infected by CaMV
- 2) Tomato plant infected by TYLCV
- 3) Ladder
- 4) *Dioscorea trifida* (accession#64)
- 5) *Dioscorea sansibarensis* (accession#269)
- 6) *Dioscorea bulbifera* (accession#272)
- 7) *Dioscorea dumetorum* (accession#47)
- 8) *Dioscorea togoensis* (accession#114, seedling)
- 9) *Dioscorea praehensilis* (accession#255)
- 10) *Dioscorea rotundata* (accession#118, seedling)
- 11) *Dioscorea nummularia* (accession#335)
- 12) *Dioscorea alata* (accession#297, seedling)
- 13) *Dioscorea alata* (accession#313 seedling)
- 14) *Dioscorea alata* (accession#402 seedling)..

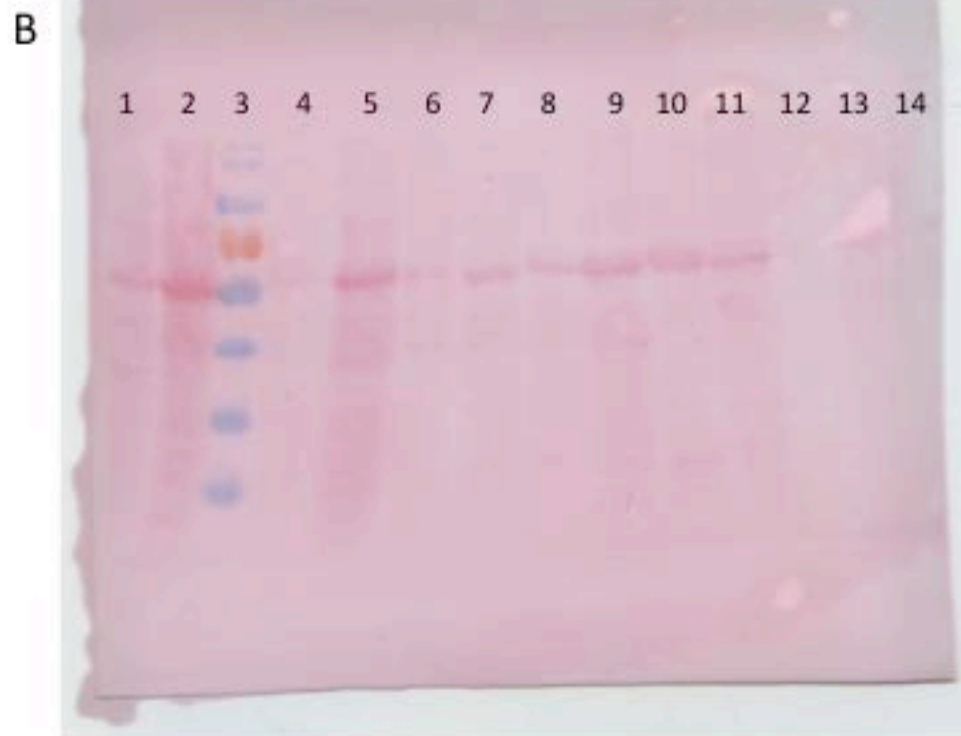

Figure S6

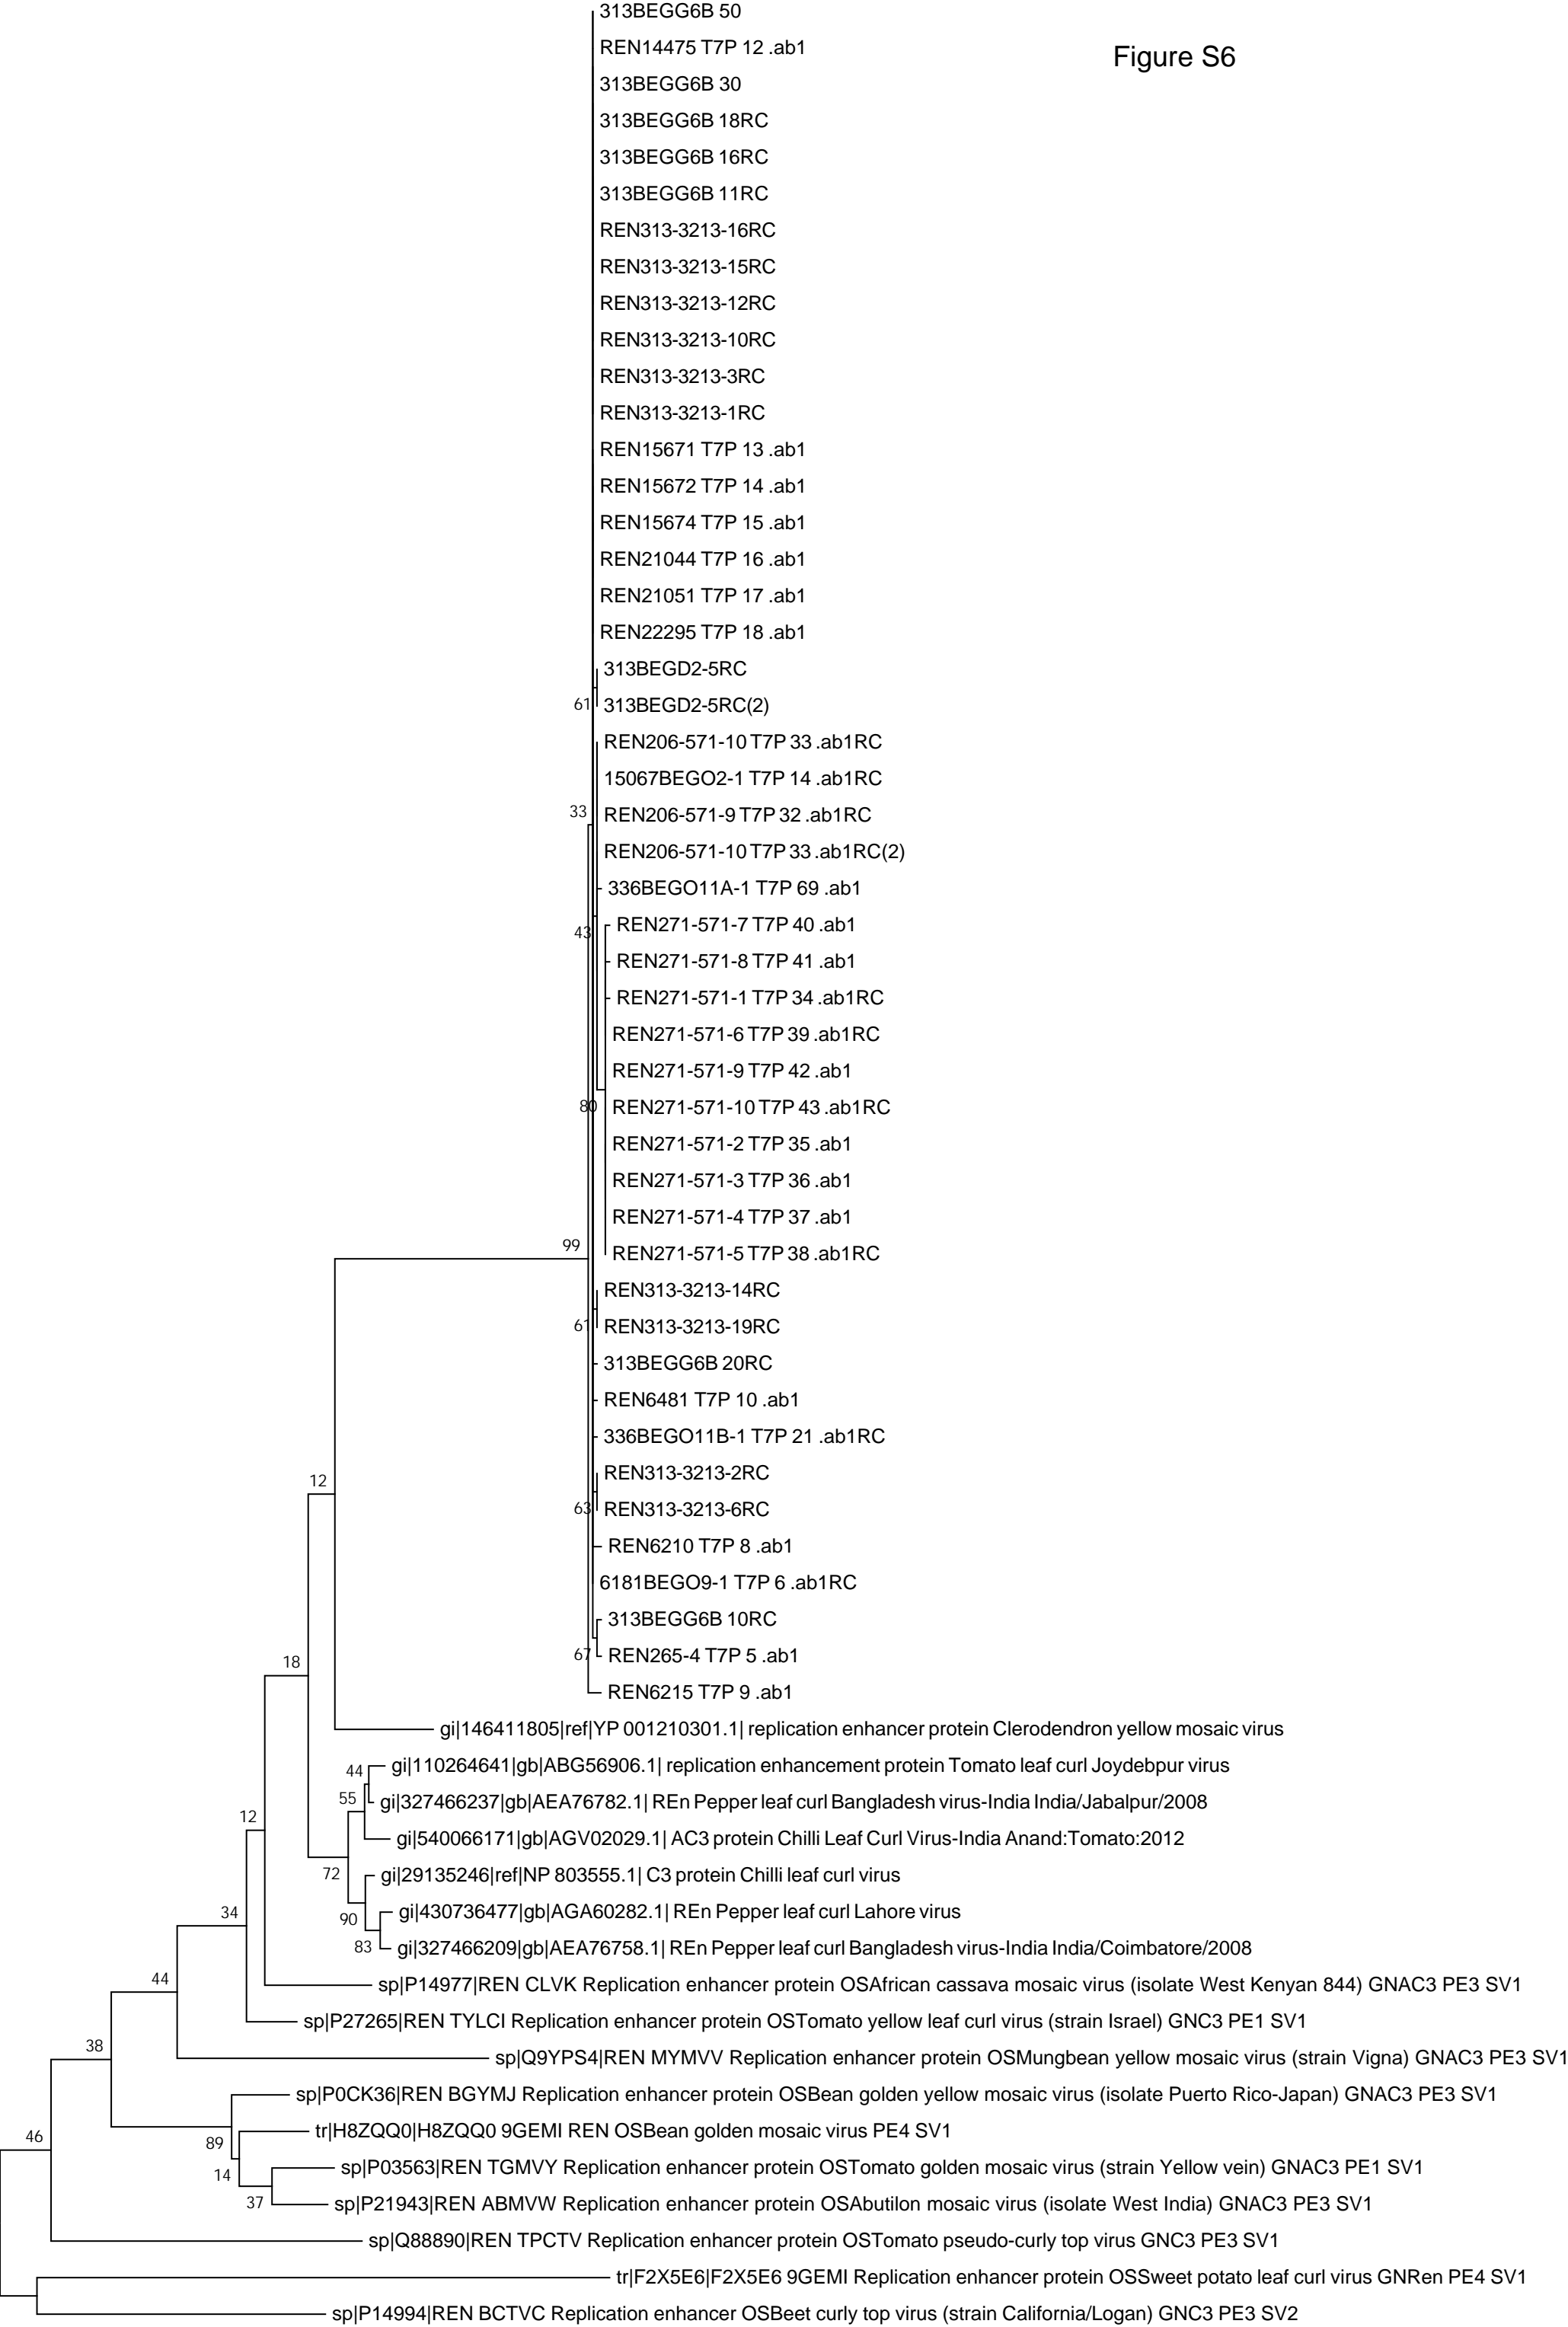

0.2

### A Sequence duplication only at integration

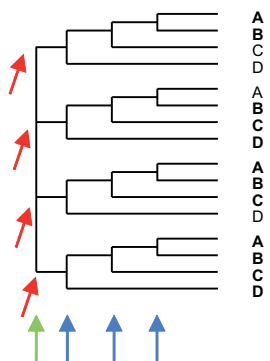

Sampling

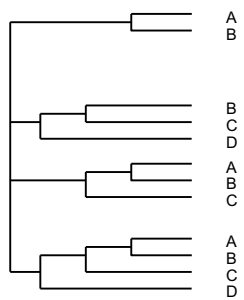

- ← Speciation events
- ← Integration event
- ← Sequence duplication events

Real endogenous sequence tree

Tree inferred after sampling

### B Repeated sequence duplications post-integration

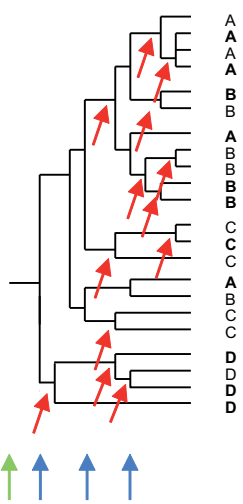

Sampling

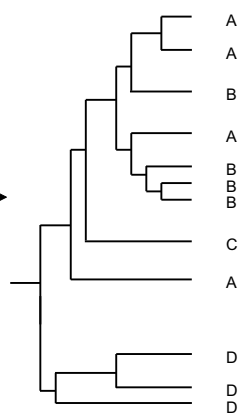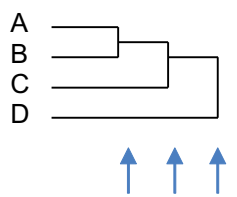

Chloroplast genome tree

Real endogenous sequence tree

Tree inferred after sampling

Figure S7

**Supplementary Table 1.** List of primers used in this study

| <b>Material and method part</b>                                    | <b>Primer name</b>                                            | <b>Sequence</b>                |                        |
|--------------------------------------------------------------------|---------------------------------------------------------------|--------------------------------|------------------------|
| Full genome amplification of EGV1                                  | YLCV2F                                                        | AGATGTGGAGAACCATCCTC           |                        |
|                                                                    | YLCV1R                                                        | GGTTATTCGATCTTCACTCAC          |                        |
| Whole EGV1 and EGV2 <i>rep</i> genes amplification                 | <i>rep</i> _EGV1_D_alataF                                     | GCCGGAATTTGTTGAAGCTG           |                        |
|                                                                    | Primer Set1                                                   | <i>rep</i> _EGV1_D_alataR      | GGTCCATTAGCTTAGTGTCT   |
|                                                                    | Primer Set2                                                   | <i>rep</i> _EGV1_D_nummulariaF | TCTCACCTGTTCTGAAATCC   |
|                                                                    |                                                               | <i>rep</i> _EGV1_D_nummulariaR | GTTGGAGAAGTGTGTAAGCC   |
|                                                                    | Primer Set3                                                   | <i>rep</i> _EGV2_F             | GGAGACGTATACCGAACAAAC  |
|                                                                    |                                                               | <i>rep</i> _EGV2_R             | TGGGTTATGAGTTGTTACTTGT |
|                                                                    | Characterization of multiple EGV1 repeats from <i>D.alata</i> | <i>ren-ren</i> _D_alataF       | GTCATACATCCGGCGTCGT    |
| <i>ren-ren</i> _D_alataR                                           |                                                               | CAGCTTCAACAAATTCGGC            |                        |
| <i>rep-rep</i> _D_alataF                                           |                                                               | AATCCAATCATTATCACAGGA          |                        |
| <i>rep-rep</i> _D_alataR                                           |                                                               | GAGGATGGTTCTCCACATCT           |                        |
| Distribution of EGVs within the genomes of <i>Dioscoreacea</i> sp. |                                                               | EGV1_Detection_1F              | GTGAGTGAAGATCGAATAACC  |
|                                                                    |                                                               | EGV1_Detection_1R              | GAGGATGGTTCTCCACATCT   |
|                                                                    | EGV1_Detection_2F                                             | CGCGCAGCRTCATTRATCTG           |                        |
|                                                                    | EGV1_Detection_2R                                             | TGGGGWGAGTTYCAGGTTGA           |                        |
|                                                                    | EGV2_Detection_1F                                             | AGGAATGGAAGTCAAGTCGTA          |                        |
|                                                                    | EGV2_Detection_1R                                             | AGGTTTCAGATTCCAGCTATTC         |                        |
|                                                                    | EGV2_Detection_2F                                             | TTCCAGGTGTTCTTCTATCTC          |                        |
|                                                                    | EGV2_Detection_2R                                             | GTCACTACCAASRAAAYGCTTC         |                        |

**Supplementary Table 2.** Prevalence of EGV1 and EGV2 sequences among a collection of 9 *D. alata* plants collected worldwide, including two *D. alata* plants grown from true seeds under virus-free conditions.

| <b>Species</b>  | <b>Accession number</b> | <b>Sampling location</b>      | <b>EGV1<br/>292 bp</b> | <b>EGV2<br/>1274 bp</b> |
|-----------------|-------------------------|-------------------------------|------------------------|-------------------------|
| <i>D. alata</i> | 301                     | Brazil                        | +                      | +                       |
|                 | 440                     | Costa-Rica                    | +                      | +                       |
|                 | 71                      | Cuba                          | +                      | +                       |
|                 | 408                     | Ghana                         | +                      | +                       |
|                 | 314                     | Haiti                         | +                      | +                       |
|                 | 313, 402                | India (grown from true seeds) | +                      | +                       |
|                 | MDG009                  | Madagascar                    | +                      | +                       |
|                 | 167                     | Vanuatu                       | +                      | +                       |

**Supplementary Table 3.** Viral sequences recovered from partially purified virions and EST screening.

| Procedure/plant sample                          | Virus-like sequence |                 | Best hit obtained from NCBI Blast (BlastN or BlastX) |                       |                     |                  |         |              |         |             |       |
|-------------------------------------------------|---------------------|-----------------|------------------------------------------------------|-----------------------|---------------------|------------------|---------|--------------|---------|-------------|-------|
|                                                 | Plant vs EST        | Name            | Length (bp)                                          | Family                | Genus               | Accession Number | Species | Identity (%) | E-value | Gene        | Blast |
| Virion - <i>D. alata</i> - VU564a               |                     | EGV1            | 209                                                  | <i>Geminiviridae</i>  | <i>Begomovirus</i>  | DQ665866         | SiGMBV  | 71           | 3e-08   | Rep         | N     |
| ESTs - <i>D. alata</i><br>(dbEST Id : 71472229) |                     | HO836974        | 274                                                  | <i>Caulimoviridae</i> | <i>Badnavirus</i>   | L14546           | CSSV    | 72           | 2e-11   | Polyprotein | N     |
|                                                 |                     | HO838291 (EGV2) | 316                                                  | <i>Geminiviridae</i>  | <i>Begomovirus</i>  | HM585443         | SiMBoV2 | 72           | 1e-20   | Rep         | N     |
|                                                 |                     | Contig3987      | 2306                                                 | <i>Potyviridae</i>    | <i>Macluravirus</i> | AB044386         | ChYNMV  | 72           | 1e-75   | CP          | N     |
|                                                 |                     | HO833648        | 325                                                  | <i>Secoviridae</i>    | Unassigned          | NP733954         | SMoV    | 45           | 1e-17   | RdRP        | X     |
|                                                 |                     | Contig1995      | 2308                                                 | <i>Secoviridae</i>    | <i>Sadwavirus</i>   | NP620567         | SDV     | 21           | 3e-6    | Polyprotein | X     |
|                                                 |                     | Contig2044      | 2535                                                 | <i>Secoviridae</i>    | Unassigned          | NP733984         | SMoV    | 22           | 1e-16   | CP          | X     |
|                                                 |                     | Contig2047      | 2027                                                 | <i>Secoviridae</i>    | <i>Sadwavirus</i>   | NP620567         | SDV     | 23           | 5e-16   | Polyprotein | X     |
|                                                 |                     | Contig2049      | 2577                                                 | <i>Secoviridae</i>    | <i>Sadwavirus</i>   | BAD12076         | SDV     | 21           | 5e-19   | CP          | X     |
|                                                 | Contig2216          | 2950            | <i>Secoviridae</i>                                   | Unassigned            | EU419645            | BRNV             | 84      | 3e-08        | RdRP    | N           |       |

**Supplementary Table 4. Selection analyses results (*N. benthamiana*).** For each test, each clade was assigned to a foreground partition (FG), or one of two background partitions (BG1 and BG2). We report p-values for significance tests for purifying selection along foreground lineages, and the parameter point-estimates for the foreground partition under the alternative model (which allows purifying selection).

| GRD3      | GRD5      | Connecting branch | p-value for neg. selection | $\omega_1$ | $p_1$ |
|-----------|-----------|-------------------|----------------------------|------------|-------|
| BG 1      | BG 2      | <b>FG</b>         | $7.9 \times 10^{-12}$      | 0.043      | 1     |
| BG 1      | <b>FG</b> | BG 2              | 0.44                       | 0.75       | 1     |
| <b>FG</b> | BG 1      | BG 2              | 0.995                      | 0.94       | 0.65  |
| <b>FG</b> | <b>FG</b> | BG                | 0.55                       | 0.82       | 1     |
